# Supplementary material for: Regulation of phagocyte triglyceride by a STAT-ATG2 pathway controls mycobacterial infection
Source: PubMed Central journal article supplement (PMC5343520; doi:10.1038/ncomms14642), 2017-03-06
Supplement: ncomms14642-s1.pdf [file ncomms14642-s1.pdf]

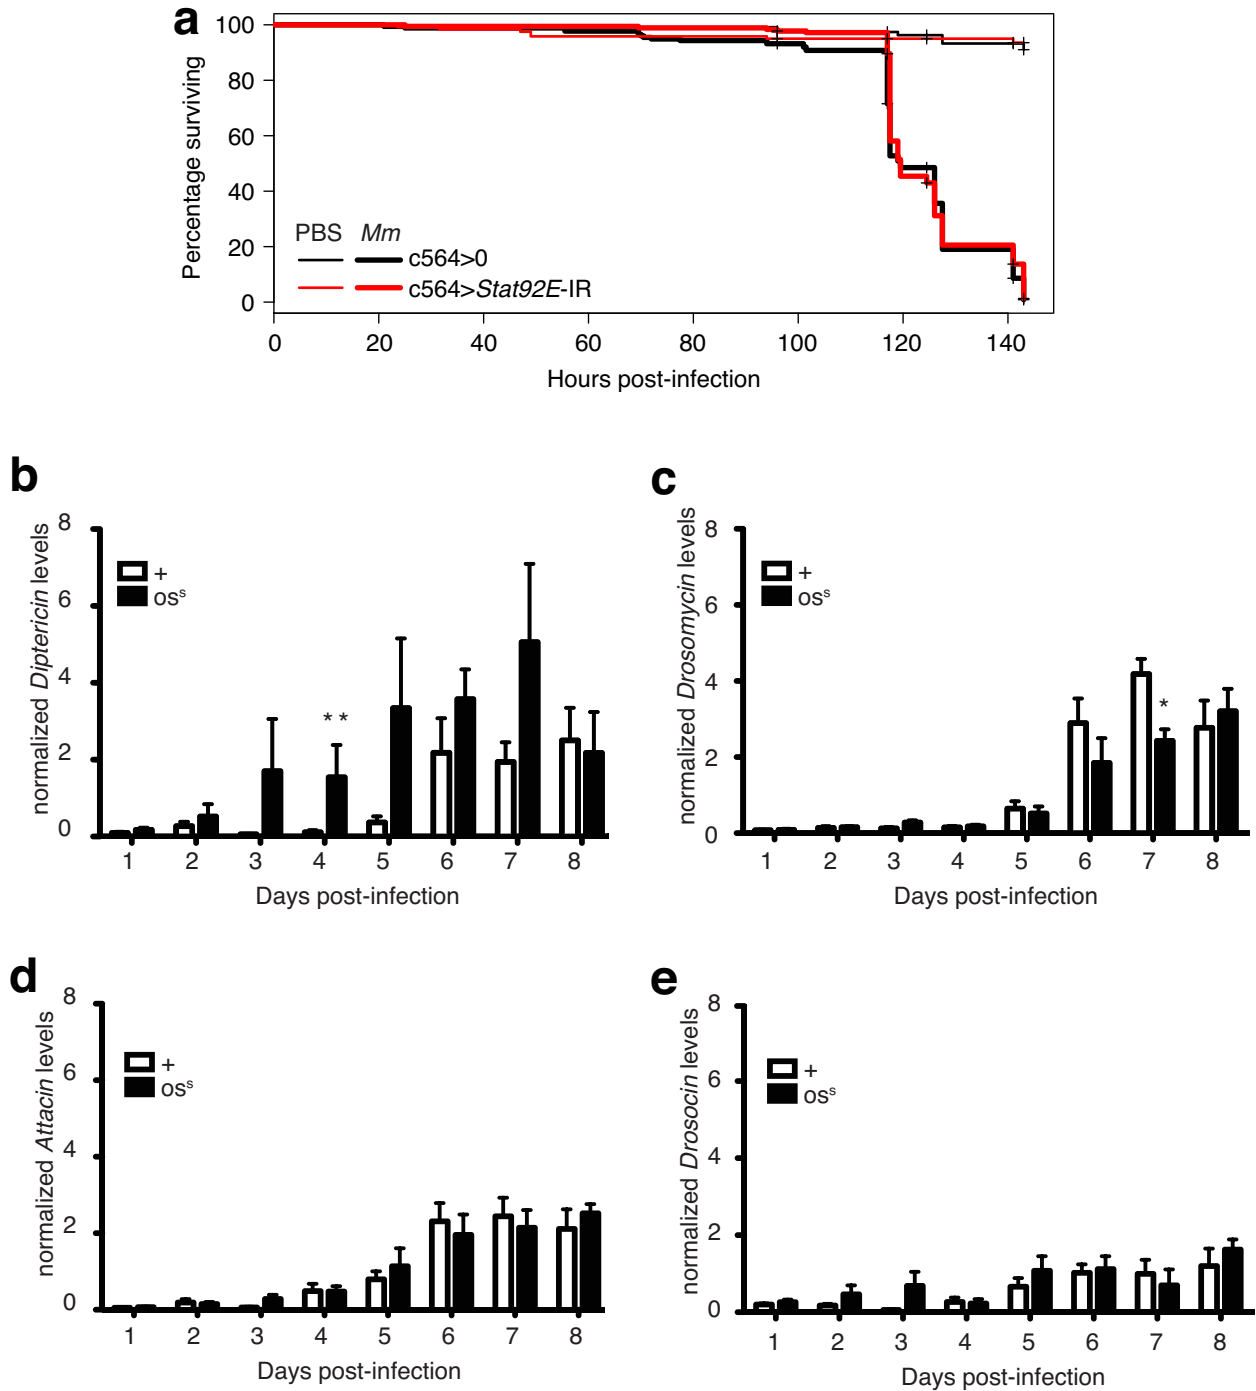

**Supplementary Figure 1.**

(a) Survival of flies with *Stat92E* knocked down in fat body (*c564>Stat92E-IR*) and controls (*c564>0*) after infection with 5000 CFU *M. marinum*.

(b-e) Normalised *Diptericin*, *Drosomycin*, *Attacin* and *Drosocin* expression over RpL1 in *os<sup>S</sup>* mutants and controls at different timepoints following infection with *M. marinum* (500 CFUs). Only a few values are statistically different (\* $p < 0.05$  and \*\* $p < 0.01$  by Mann-Whitney test,  $n = 6$ ).

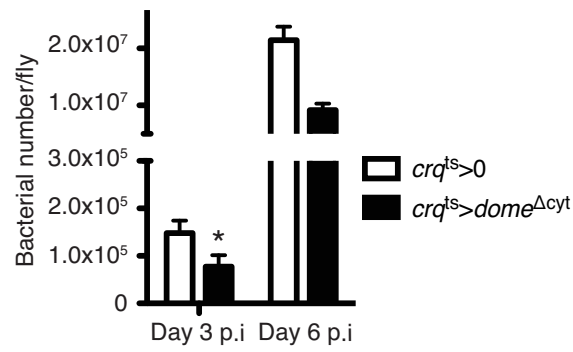

### Supplementary Figure 2.

Numbers of *M. marinum* at different times after infection in control ( $w^{1118}$ ; *tub-Gal80<sup>ts</sup>* / + ; *crq-Gal4* / +) and inducible hemocyte-specific dominant negative *Domeless* ( $w^{1118}$ ; *tub-Gal80<sup>ts</sup>* / + ; *crq-Gal4* / *UAS-Dome<sup>Δcyt-3-1</sup>*) flies, assayed by qRT-PCR. Values are statistically different at day 3 and 6 after infection (\* $p < 0.05$  and \*\* $p < 0.01$  by Mann-Whitney test,  $n=6$ ).

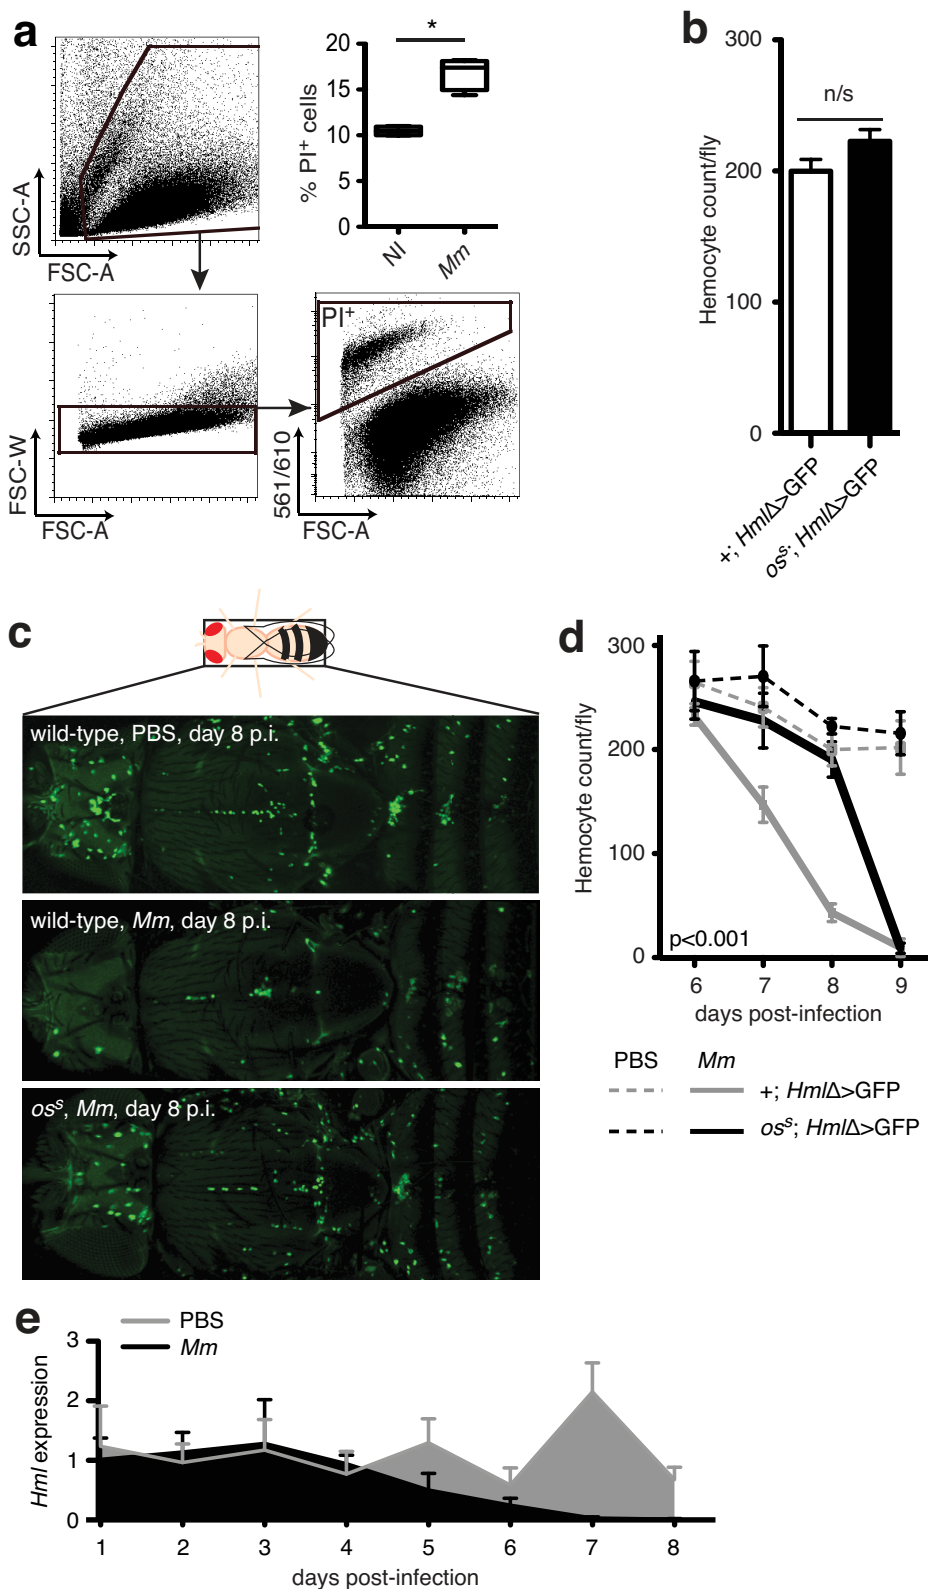

### Supplementary Figure 3.

(a) FACS scheme for analysis of cell death in S2R<sup>+</sup> cells (exclusion of debris followed by exclusion of doublets based on light-scattering characteristics, followed by quantification of cell death based on PI incorporation). Upper right corner, percentage of dead (PI<sup>+</sup>) S2R<sup>+</sup> cells 24 hours after infection with *M. marinum* (MOI=20) or not infected. Values are statistically different (\*, *p*<0.05) by Mann-Whitney test, *n*=9.

(b) Number of GFP<sup>+</sup> cells in 400μm sections in the back of flies carrying *HmlΔ*-Gal4 driving UAS-GFP on the *os<sup>s</sup>* background or the isogenic wild-type control. Intravital imaging was performed on

adult flies from 5 days after hatching and analysed with the imaging software Imaris. Values are not statistically different by Mann-Whitney test, n=57 (wild-type)/56 (*os<sup>s</sup>*).

(c) Number of GFP<sup>+</sup> cells at different times after infection with *M. marinum* at 500CFUs or post-injection with PBS. Fly genotypes and imaging technique as in b. Representative images at day 8 post-infection or PBS-injected are shown.

(d) Quantification of hemocyte numbers, taken from images as shown in c. for all genotypes (left). P-value for difference between *os<sup>s</sup>* and control curves by two-way ANOVA, n=4/5 flies per timepoint except for day 9 where n=2/3.

(e) *Hemolectin* expression in wild-type flies at different times after injection with *M. marinum* (500 CFUs) or PBS. *Hml* expression was assayed by qRT-PCR and normalized to *Rpl1*.

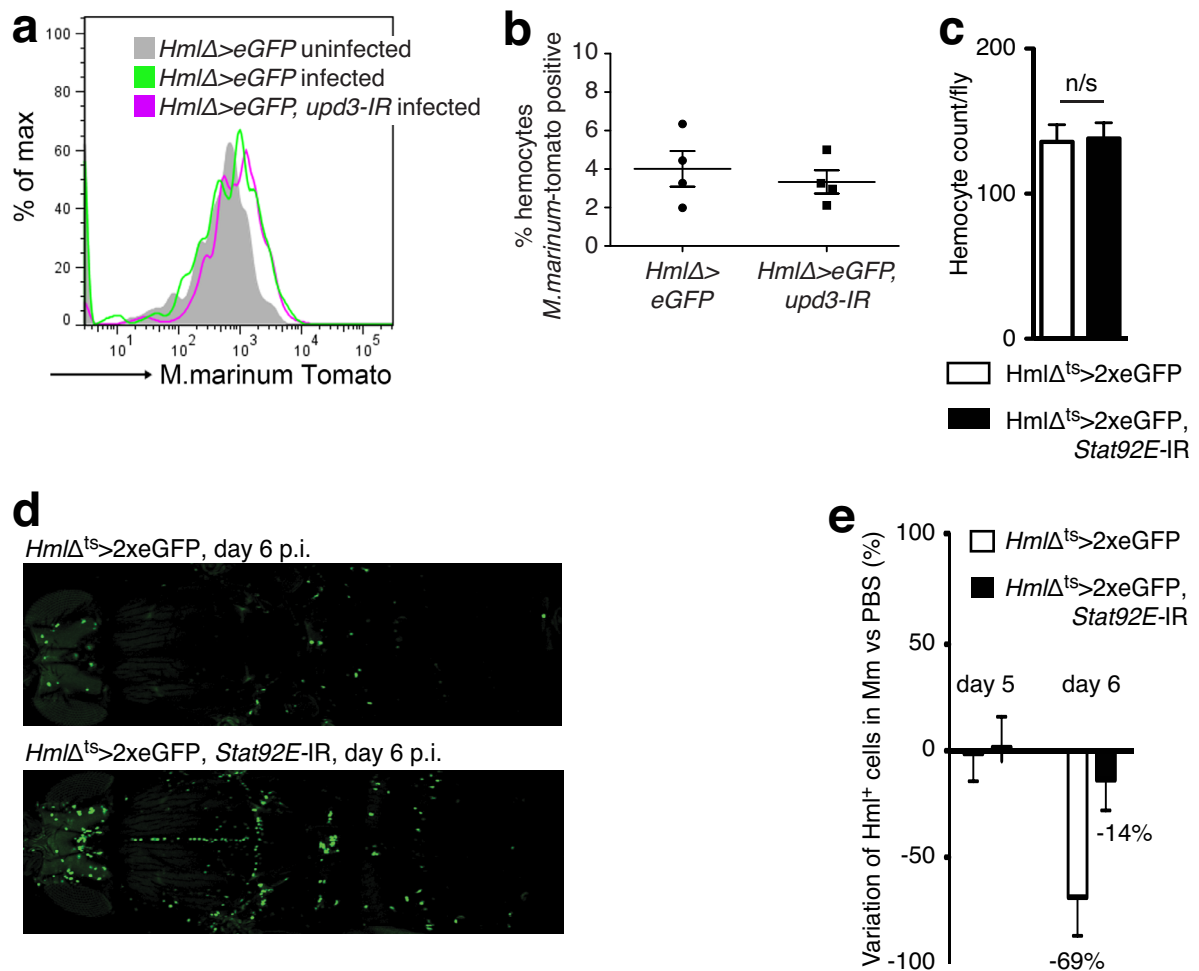

#### Supplementary Figure 4.

(a) Histogram showing tomato fluorescence in hemocytes sorted using *HmlΔ-Gal4* driven *eGFP* from flies uninfected or infected with tomato-expressing *M. marinum* (*msp12::tomato*).

(b) Quantification of the tomato-positive cell fraction from (a).

(c) Number of GFP<sup>+</sup> cells in 400μm sections in the back of flies carrying *HmlΔ-Gal4* driving *UAS-GFP* and the inducible-hemocyte-specific *Stat92E*-knockdown (*w<sup>1118</sup>*, *UAS-Stat92E-IR*; *UAS-Stat92E-IR* / *HmlΔ-Gal4*, *UAS-2xeGFP* ; *tub-Gal80<sup>ts</sup>* / +) or in control flies (*w<sup>1118</sup>*; *HmlΔ-Gal4*, *UAS-2xeGFP* / + ; *tub-Gal80<sup>ts</sup>* / +). Flies were switched from 18° to 29° immediately after hatching and kept at that temperature for 5 to 7 days prior to imaging. Values are not statistically different, n=8.

(d) Representative images of GFP<sup>+</sup> cells in live flies after 6 days of infection. Infectious dose was 500 CFU, genotypes and temperature as in (a).

(e) Variation in the number of GFP<sup>+</sup> cells between *M. marinum* and PBS-injected flies, for each genotype as described in e (quantification from images as in (b)). Values are statistically different after 5 days of infection (\*\*, p<0.01 by Mann-Whitney test, n=4/5 per timepoint).

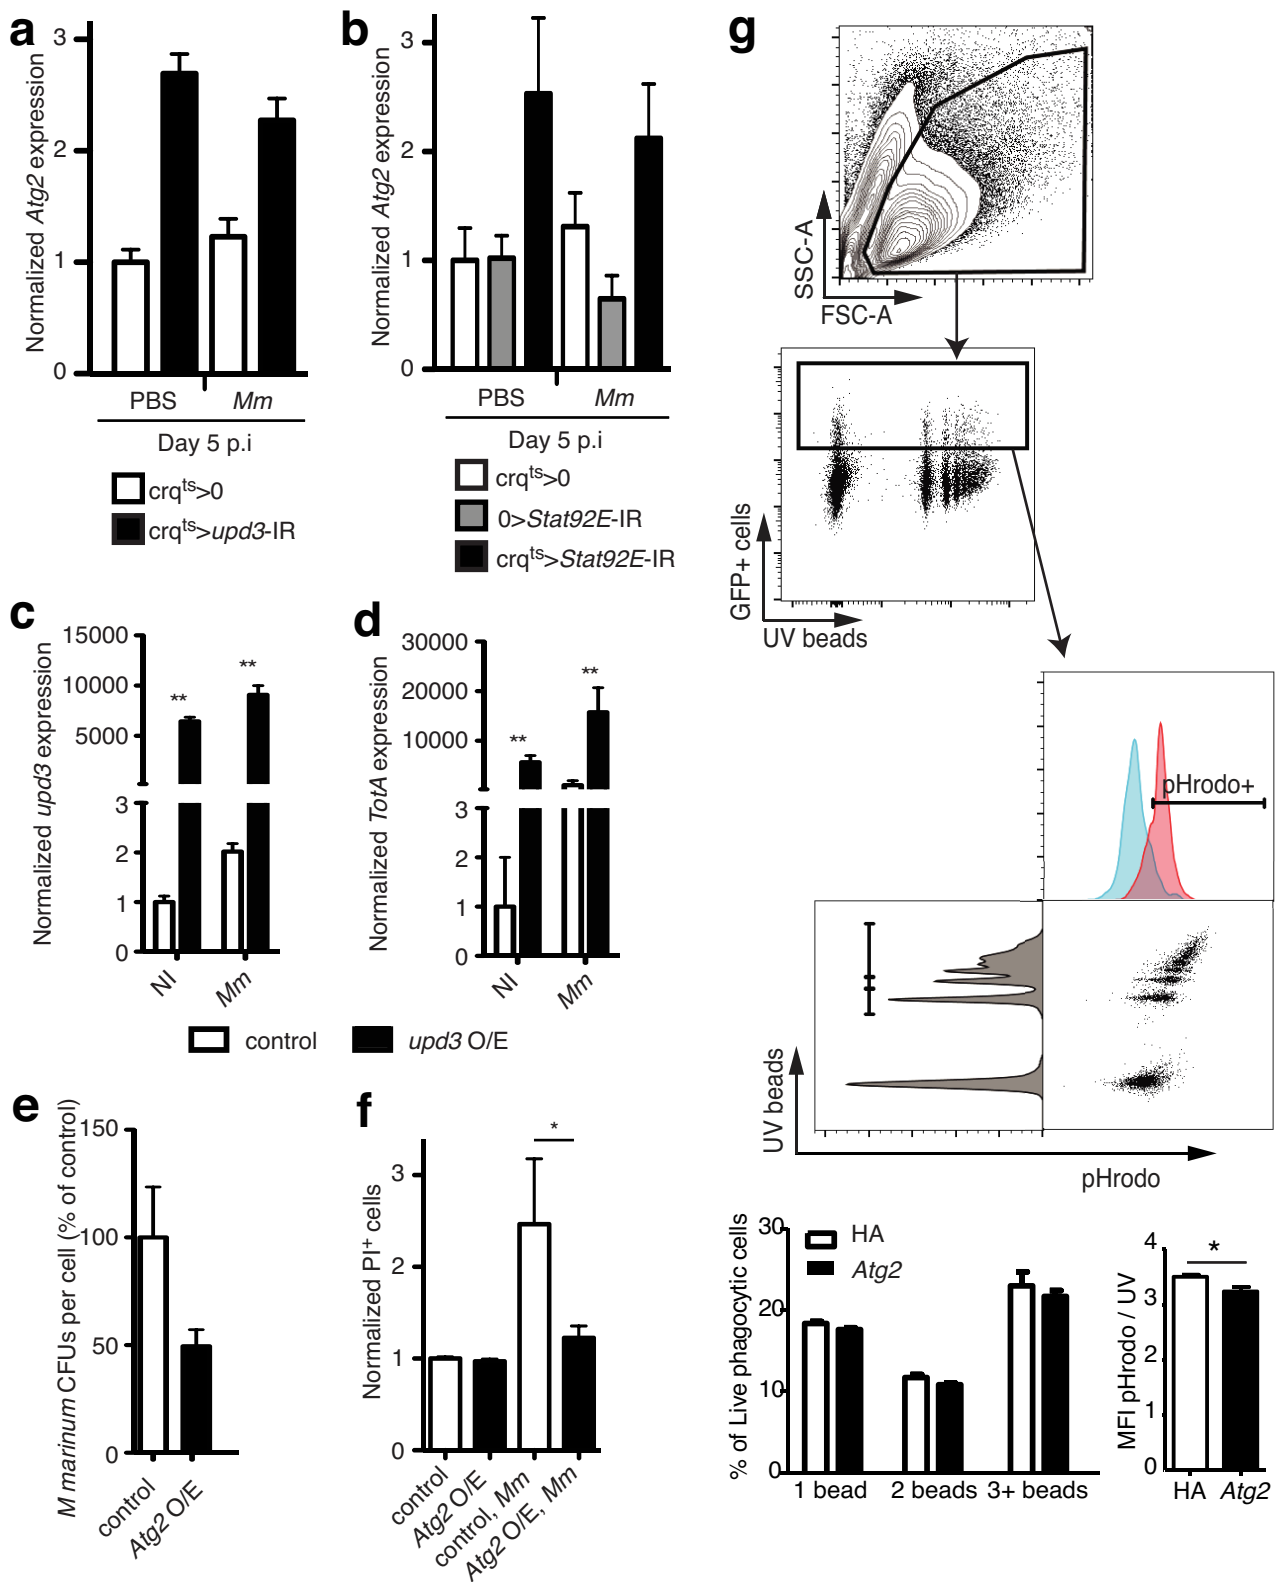

### Supplementary Figure 5.

(a) Expression of *Atg2* by qRT-PCR in control ( $w^{1118}; tub-Gal80^s / +; crq-Gal4 / +$ ) and inducible hemocyte-specific *upd3*-knockdown ( $w^{1118}; UAS-upd3-IR / tub-Gal80^s; crq-Gal4 / +$ ) flies 5 days after *M. marinum* infection or PBS injection. Normalized to *Rpl1*. Values for PBS or Mm injected flies are statistically different (\*,  $p < 0.05$  by Mann-Whitney test,  $n=5$ ).

(b) Expression of *Atg2* by qRT-PCR in control ( $w^{1118}; tub-Gal80^s / +; crq-Gal4 / +$ ) and inducible hemocyte-specific *Stat92E*-knockdown ( $w^{1118}; UAS-Stat92E-IR; UAS-Stat92E-IR / tub-Gal80^s; crq-Gal4 / +$ ) flies 5 days after *M. marinum* infection or PBS injection. Normalized to *Rpl1*.

- (c) Expression of *upd3* by qRT-PCR in infected or uninfected S2R<sup>+</sup> cells overexpressing *HA* (control) or *upd3*. Values are statistically different (\*\* $p < 0.01$  by Mann-Whitney test,  $n=6$ ).
- (d) For the same samples as in (a), TotA expression was assayed by qRT-PCR. Values are statistically different (\*\* $p < 0.01$  by Mann-Whitney test,  $n=6$ ).
- (e) Viable intracellular *M. marinum* in S2R<sup>+</sup> cells overexpressing *HA* (control) or *Atg2*. Bacterial count was assayed by plating lysed S2R<sup>+</sup> cells after 24 hours of infection and colony forming units were assessed after a 2-week incubation at 29 degrees,  $n=3$ .
- (f) Cell death in control and *Atg2*-overexpressing cells infected with *M. marinum* or uninfected, quantified as in Figure 2A. Values for *Mm*-infected cells are statistically different (\*,  $p < 0.05$  by Mann-Whitney test,  $n=3$  for *Atg2* O/E and  $n=9$  for controls).
- (g) A pulse-chase phagocytosis experiment using pHrodo<sup>TM</sup>-coated UV beads or UV beads alone on S2R<sup>+</sup> cells overexpressing GFP-ATG2 or control cells. FACS analysis of the cells after the chase period is presented on the left. For cells overexpressing GFP-ATG2, GFP<sup>+</sup> cells were selected for the analysis. The percentage of live cells internalizing one, two or more than two beads was assessed by quantifying pHrodo<sup>+</sup> cells at increasing UV intensities (top right). To distinguish differential acidification of the endosomes between the two genotypes, the Mean Fluorescence Intensity of pHrodo in cells cultured with pHrodo-coated UV beads over the same cells cultured with UVbeads alone was measured (bottom right). Values for the percentage of live phagocytic cells are not statistically different by Mann-Whitney test,  $n=6$ . For the mean pHrodo/UV, values are statistically significant (\* $p < 0.05$  by Mann Whitney test,  $n=12$ ).

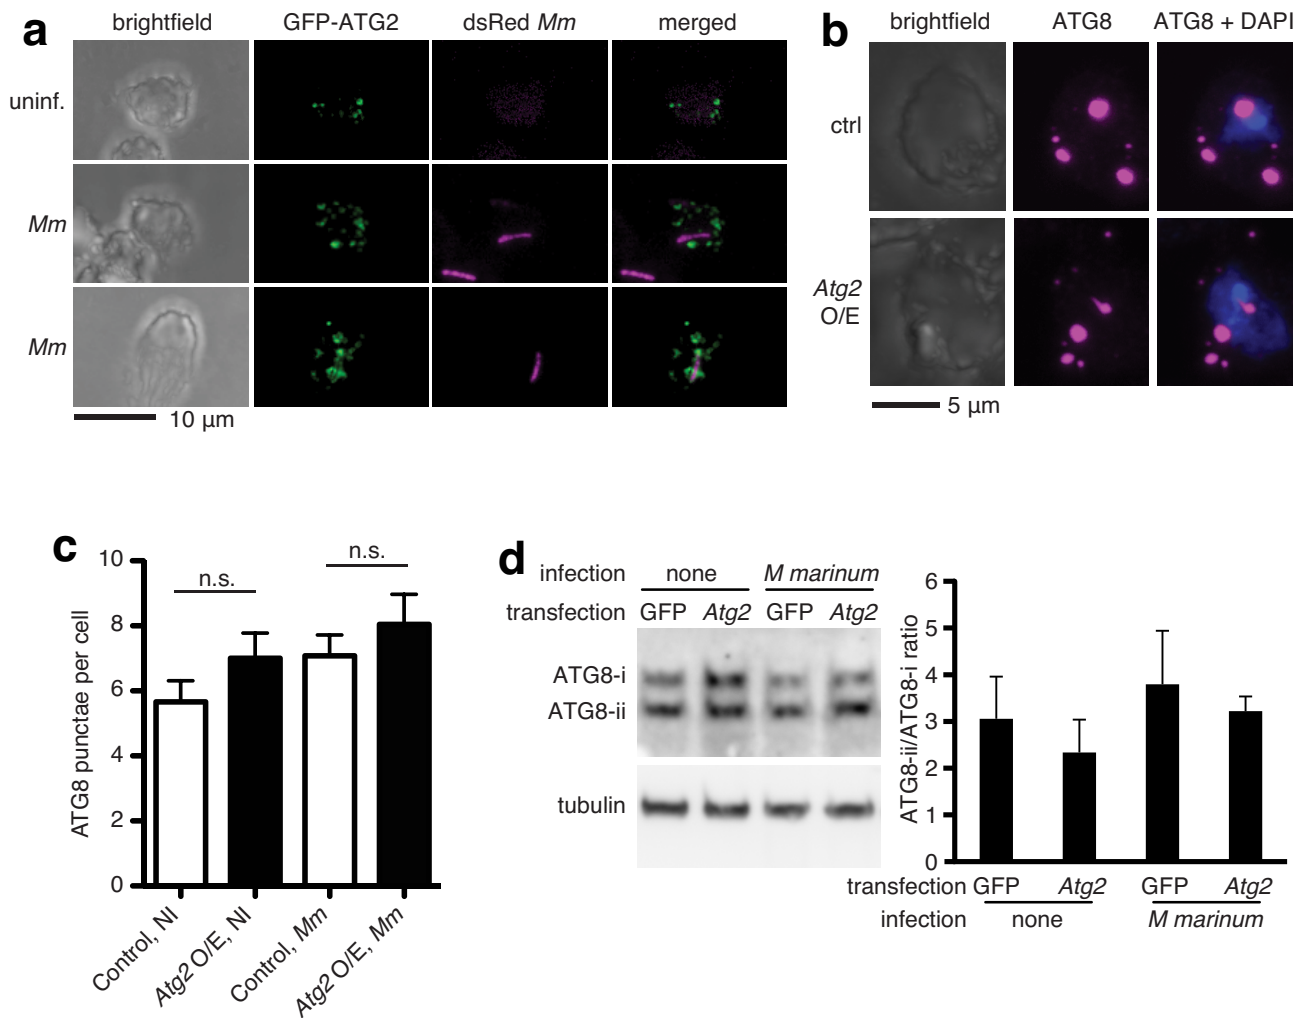

### Supplementary Figure 6.

(a) Typical images showing localization of GFP-ATG2 in S2R<sup>+</sup> cells without (top row) or with (lower two rows) infection by dsRed-expressing *M. marinum*. The middle row shows intracellular *M. marinum* without any evident colocalized ATG2-GFP; the bottom row shows an ATG2-coated intracellular bacterium.

(b) Typical images showing ATG8 punctae (magenta) in control and *Atg2*-overexpressing cells. For this experiment, a rabbit anti-Atg8 Antibody (Cherry Lab) was used in combination with an anti-rabbit Cy5 secondary antibody (Jackson Laboratories).

(c) Quantification of ATG8 puncta numbers from cells treated as in (b). Values are not statistically different (Mann-Whitney test, n=48 to 65).

(d) Relative levels of ATG8-I, ATG8-II, and  $\alpha$ -tubulin in control cells and cells overexpressing *Atg2* and treated with BafA1. For this experiment, a rabbit anti-ATG8 Antibody (Köhler Lab) was used in combination with an anti-rabbit HRP secondary antibody (Invitrogen). The quantification (right) reveals no difference in ATG8-II between cells overexpressing *Atg2* and controls, n=3. Full scanned areas for the lanes shown are in Supplementary Figure 7.



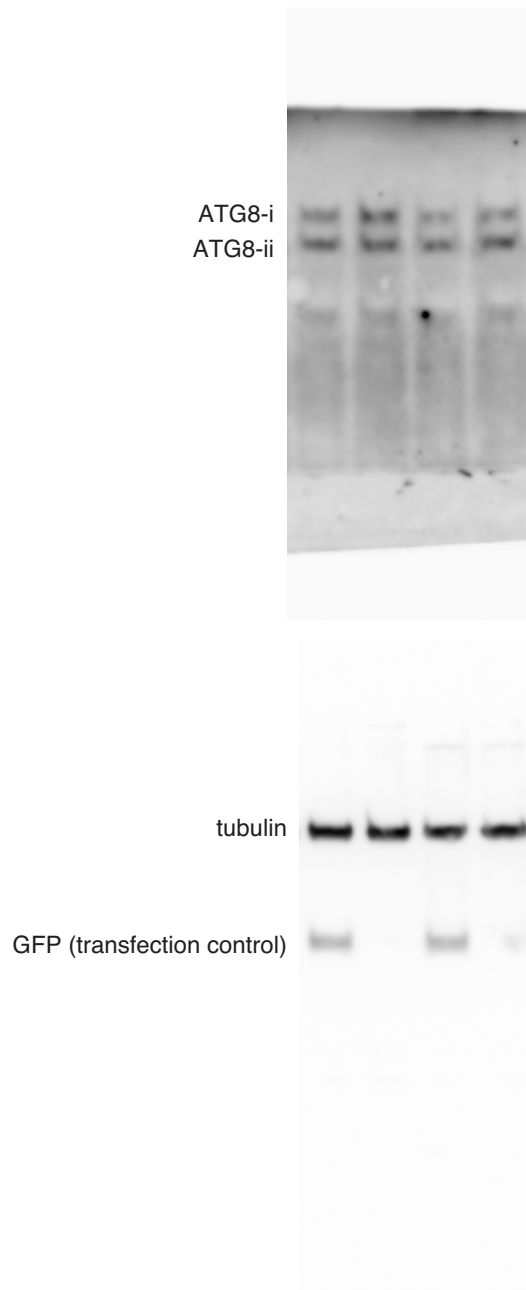

**Supplementary Figure 7.**

Full scanned areas for the blots shown in Supplementary Figure 6. The tubulin blot was probed simultaneously with anti-GFP to detect the control transfection (GFP alone) and the experimental transfection (ATG2-GFP). The ATG2-GFP band cannot be seen because this portion of the blot was not imaged (the ~250kDa ATG2-GFP fusion protein resolves poorly on the 13% gel used here).

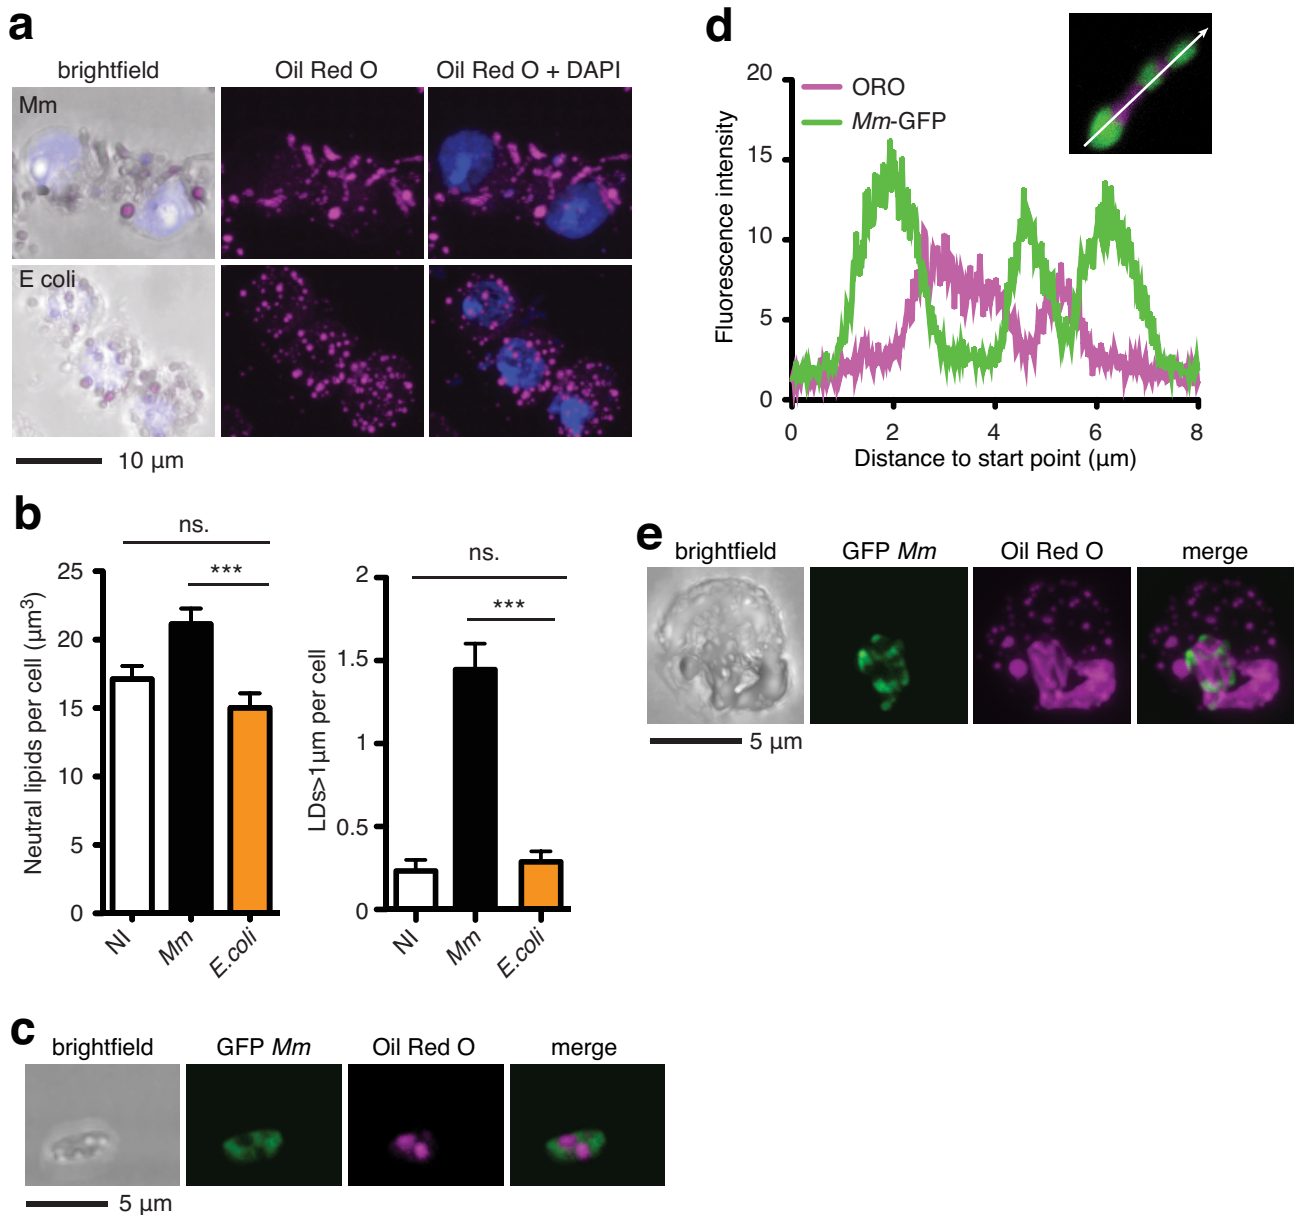

### Supplementary Figure 8.

(a) Oil Red O-stained neutral lipids in cells infected with *M. marinum* or *E. coli* (MOI 10).

(b) Quantification of lipid volume per cell and total number of lipid droplets with at least one axis >1 $\mu\text{m}$  in length. Values are not statistically different between *E. coli* infected cells and non-infected cells. When comparing *Mm*-infected cells and *E. coli* infected cells, values are statistically different (\*\*\*,  $p < 0.001$ ) by Mann-Whitney test.  $n = 130$  for non-infected cells,  $n = 110$  for *Mm*-infected cells, and  $n = 94$  for *E. coli* infected cells.

(c) Extracellular GFP-expressing *M. marinum*, stained with Oil Red O.

(d) Fluorescence localization and intensity in a bacterium treated as in (C) to show non-overlap between GFP-Mm and ORO within *M. marinum*.

(e) Localization of intracellular GFP-expressing *M. marinum* and Oil Red O-stained neutral lipid. Though the bacteria are associated with a large, irregular lipid inclusion, most of the lipids are not within the bacteria.

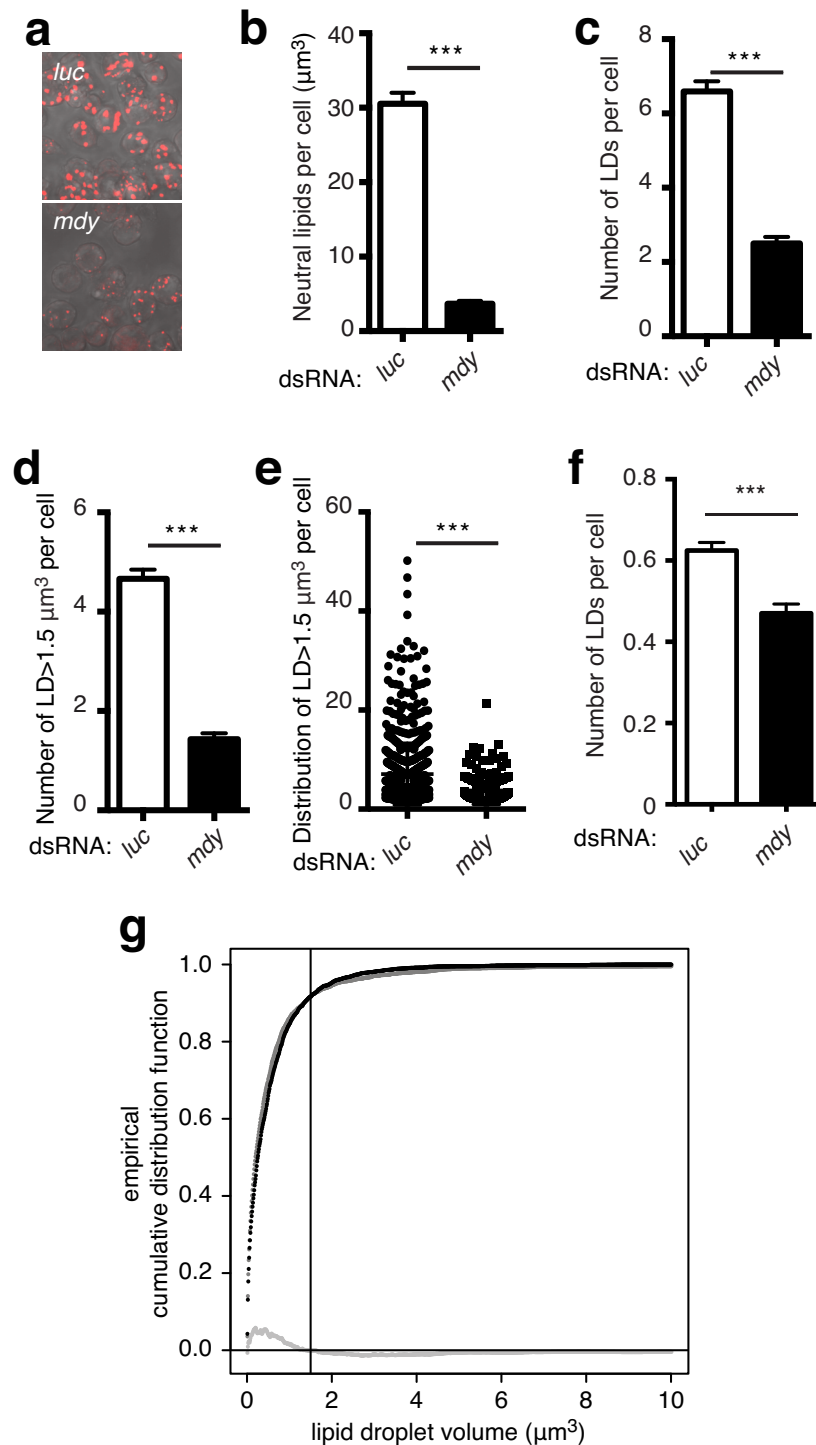

### Supplementary Figure 9.

(a) BODIPY 500/510 staining of S2R<sup>+</sup> cells showing reduced amount of lipid droplets in cells treated for 3 days with *mdy* dsRNA or *luc* dsRNA.

(b) Quantification of neutral lipid volume per cell in *mdy* and *luc* dsRNA treated cells. Values are statistically different (\*\*\*,  $p < 0.001$ ) by Mann-Whitney test,  $n = 232$  for *mdy* dsRNA,  $n = 244$  for *Luc* dsRNA).

(c) Total LD (stained with BODIPY 500/510) per cell in S2R<sup>+</sup> cells treated with either *mdy* dsRNA or *Luc* dsRNA as control. Values are statistically different (\*\*\*,  $p < 0.001$ ) by Mann-Whitney test,  $n = 232$  for *mdy* dsRNA,  $n = 244$  for *Luc* dsRNA).

(d) Number of LDs (stained with BODIPY 500/510) of volume superior or equal to  $1.5 \mu\text{m}^3$  in cells treated with dsRNA for *mdy* or *Luc*. Values are statistically different (\*\*\*,  $p < 0.001$ ) by Mann-Whitney test,  $n = 232$  for *mdy* dsRNA,  $n = 244$  for *Luc* dsRNA).

- (e) Distribution of lipid droplets of volume superior or equal to  $1.5 \mu\text{m}^3$  in cells treated with dsRNA for *mdy* or *Luc*. Volumes less than  $1.5 \mu\text{m}^3$  are not shown. Values are statistically different (\*\*\*,  $p < 0.001$ ) by Mann-Whitney test,  $n=200$  for *mdy* dsRNA,  $n=856$  for *Luc* dsRNA).
- (f) Total LD (stained with BODIPY 500/510) per cells in infected S2R<sup>+</sup> cells treated with either *mdy* dsRNA or *Luc* dsRNA. Values are statistically different (\*\*\*,  $p < 0.001$ ) by Mann-Whitney test,  $n=141$  for *mdy* dsRNA,  $n=193$  for *Luc* dsRNA).
- (g) Empirical cumulative distribution function (ECDF) of lipid droplet size in infected (black line,  $n=4050$ ) versus non-infected cells (dark grey,  $n=4210$ ). In light grey, the difference between non-infected minus infected. The two ECDF's cross at a volume of  $1.5 \mu\text{m}^3$ .

**Supplementary Table 1. RT-PCR primers used in this work.**

| <b>Gene</b>              | <b>Forward primer</b>     | <b>Reverse primer</b>  |
|--------------------------|---------------------------|------------------------|
| <i>Attacin</i>           | CACAATGTGGTGGGTCAGG       | GGCACCATGACCAGCATT     |
| <i>Atg1</i>              | GTCAGCCTGGTCATGGAGTAT     | CGTCCCCTTGACACTCAGAT   |
| <i>Atg2</i>              | CAAAAGACCTGTACGCAGAGC     | TACTGAGCAACAGGTTTCGTC  |
| <i>Atg3</i>              | GACAATGGAGGAGACAAAGGAA    | GTCCATGTCAATAGCCTCGTC  |
| <i>Atg4a</i>             | TGGGTCCTGGGAAAGAAGTA      | AATGTCCCGTCGGATGAG     |
| <i>Atg5</i>              | ACGCTATATAAGCGCCGAAC      | CAGCAGATCGTATAGGACACCA |
| <i>Atg6</i>              | CGAGCAGCTGGAGAAGATTAG     | TGTATTGCCATTGTCTCCGTA  |
| <i>Atg7</i>              | AGGATGCGCTGTAGCTAGAAA     | CGCTGTCCAAAAGGGTTATG   |
| <i>Atg9</i>              | TTCAACATTGACTTCATCTTGTTC  | CTGCCAATTGTTCTGGAAGG   |
| <i>Atg12</i>             | AATGGCAGAGACACCAGAATC     | TGGCGTTCAGAAGGATACAA   |
| <i>Atg13</i>             | ACCTCGCTGGAGGACTACG       | CGATGAGGAGCCCCTTAG     |
| <i>Atg14</i>             | GCGTCAGAAACGGAAACATT      | TGTAGCGCTGCTGCTTCTC    |
| <i>Atg16</i>             | TGGACAGTGATGGACAATCG      | GCTACCGGTCACCACTTTG    |
| <i>Atg17</i>             | CGACTATCTTAACAAGGACAAGTGC | CATTCAGATCGTAGGCAGAGC  |
| <i>Atg18a</i>            | CGTCAACTTCAACCAGAACAT     | TTGTCCAGGGTCGAGTCC     |
| <i>Diptericin</i>        | ACCGCAGTACCCACTCAATC      | CCCAAGTGCTGTCCATATCC   |
| <i>Drosocin</i>          | CCATCGAGGATCACCTGACT      | CTTTAGGCGGGCAGAATG     |
| <i>Drosomycin</i>        | GTACTTGTTCGCCCTCTTCG      | CTTGCACACACGACGACAG    |
| <i>Hemolentin</i>        | CGATGATGACGACGAGGATA      | GGCTTTGAGGATGTTGAAGC   |
| <i>pyrG (M. marinum)</i> | ACCGCTACGAGGTCAACAAT      | ATTCGACGAACTCCACCAAG   |
| <i>Rpl1</i>              | TCCACCTTGAAGAAGGGCTA      | TTGCGGATCTCCTCAGACTT   |
| <i>Turandot A</i>        | CCAAAATGAATTCTTCAACTGC    | GAATAGCCCATGCATAGAGGAC |
| <i>Stat92E</i>           | ACTAGTGGAACACCGCATCA      | AGTCCGCCATTCCAAAGTC    |
| <i>upd3</i>              | ACTGGGAGAACACCTGCAAT      | GCCCGTTTGGTTCTGTAGAT   |
